# Supplementary material
Source: PubMed Central journal article supplement (PMC2764842)
Supplement: NIHMS136587-supplement-01.pdf [file NIHMS136587-supplement-01.pdf]

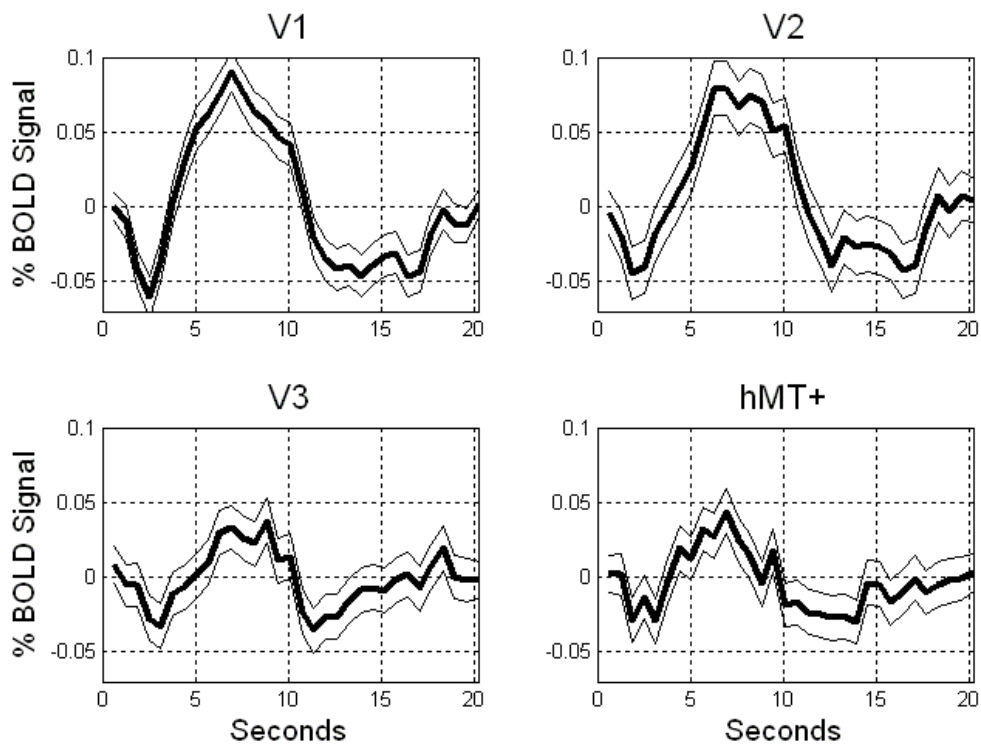

(a)

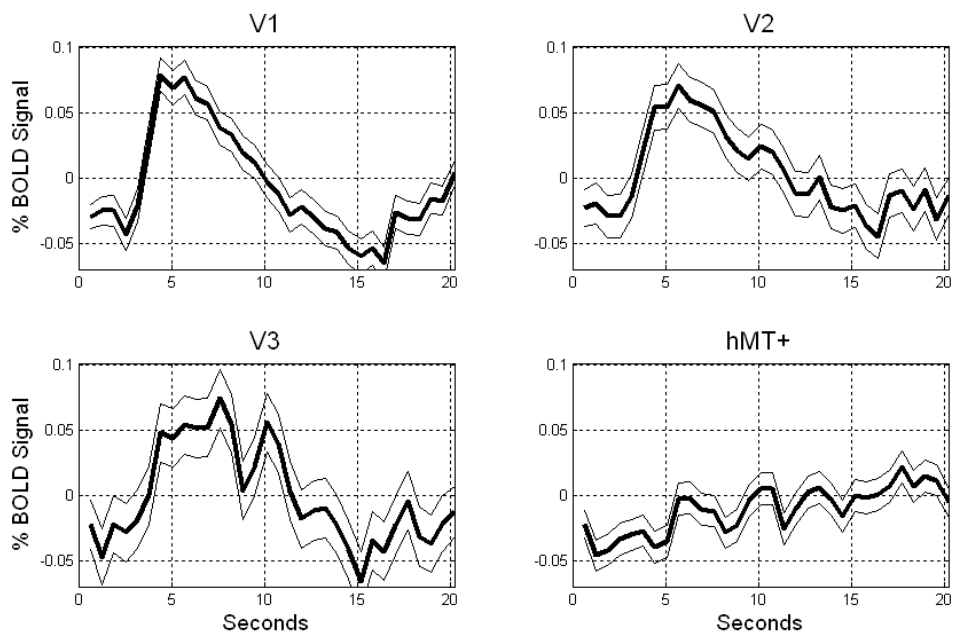

(b)

Supplementary Figure 1.

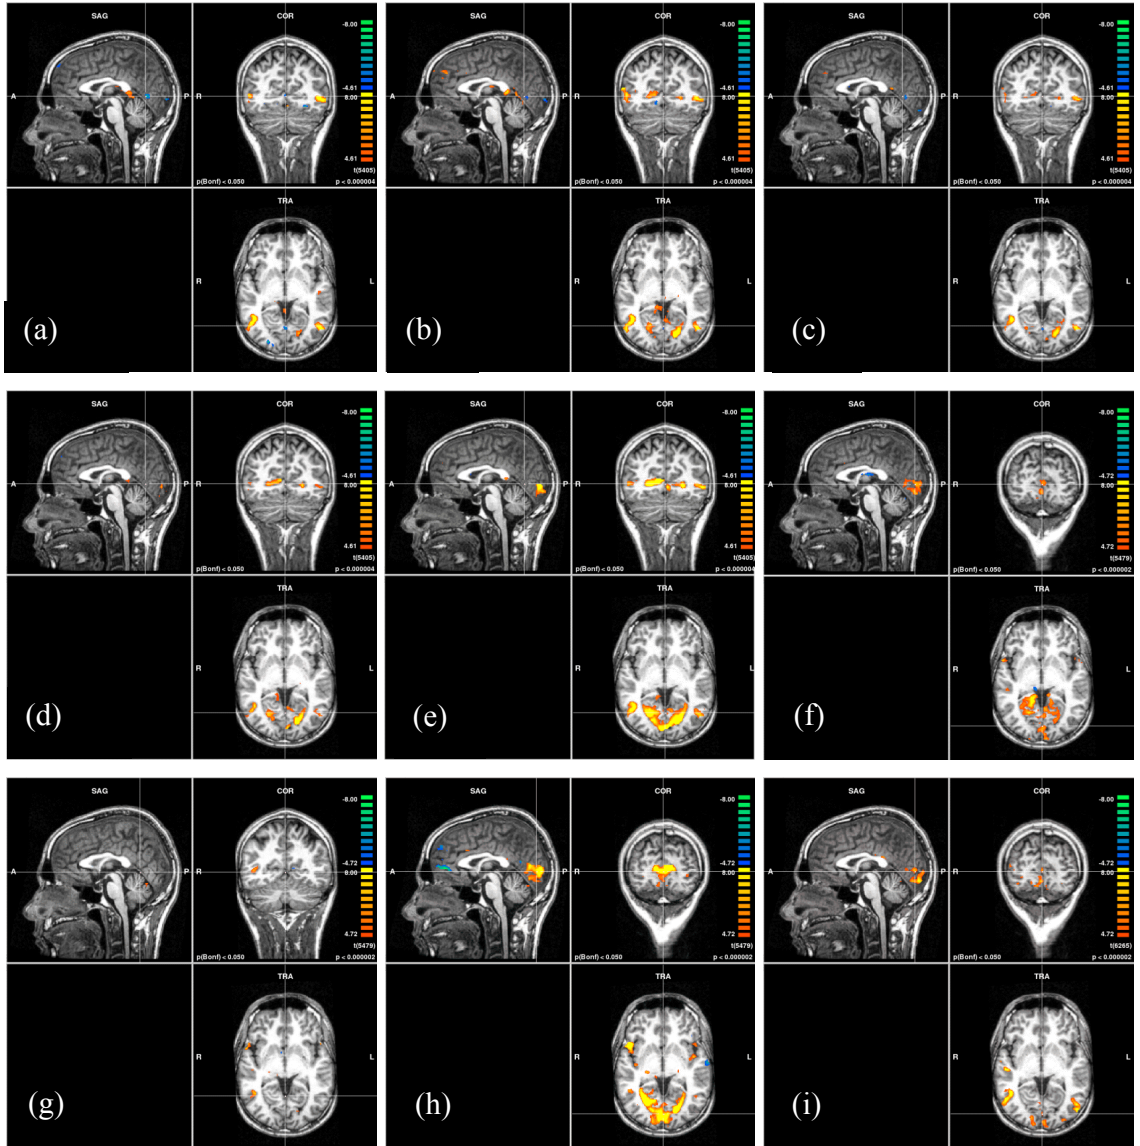

Supplementary Figure 2.

Supplementary figures for reviewers.

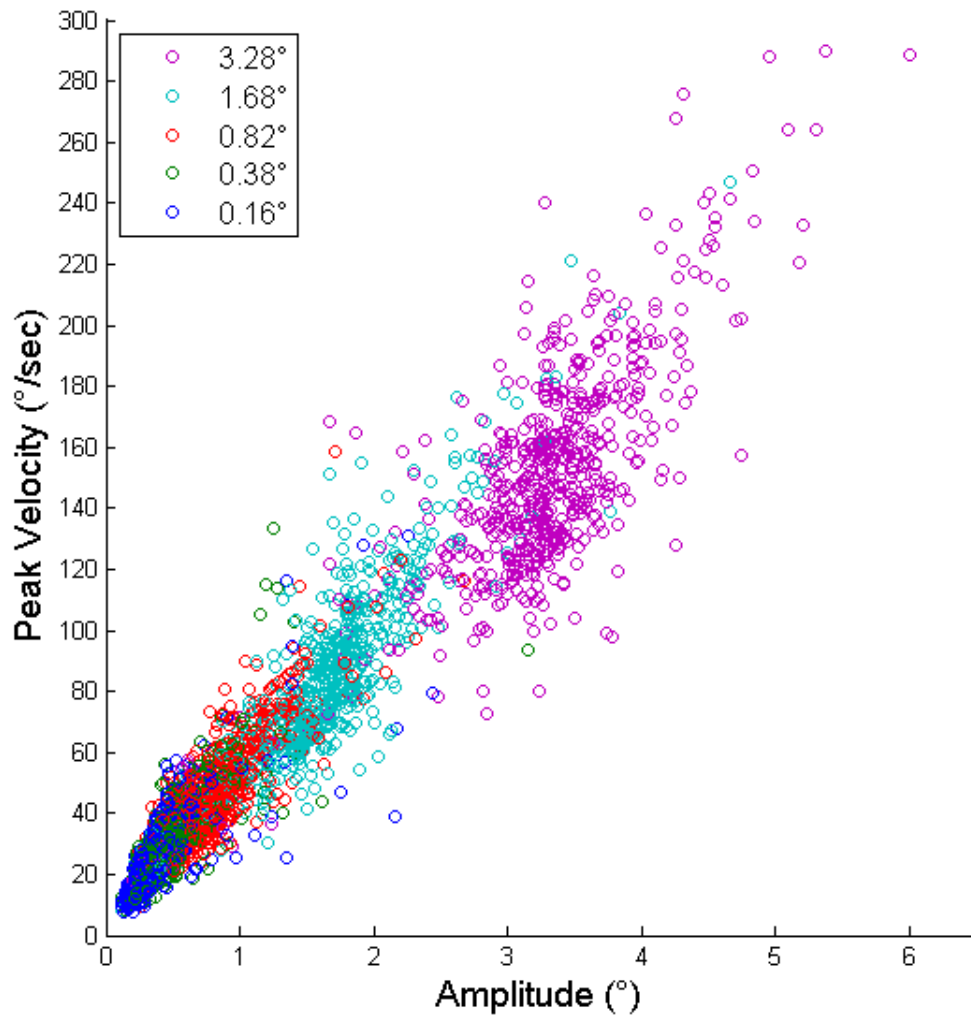

Supplementary Figure 3.

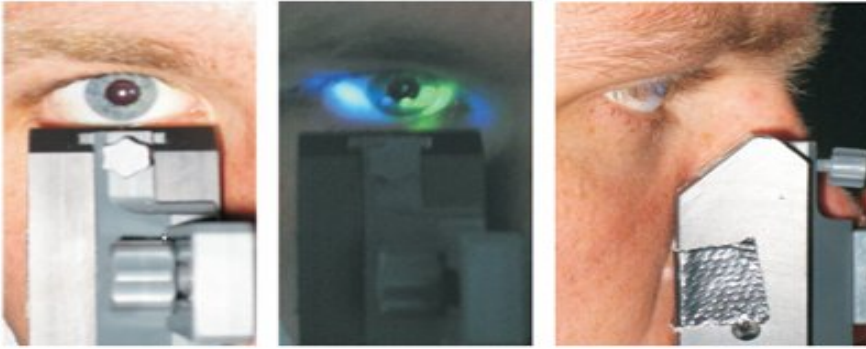

Supplementary figure 4.
